# Supplementary material
Source: publisher figshare collection journal article supplement (https://acs.figshare.com/ndownloader/files/4032913)
Supplement: Supplementary file 1 [file 4032913]

### Supplemental Information

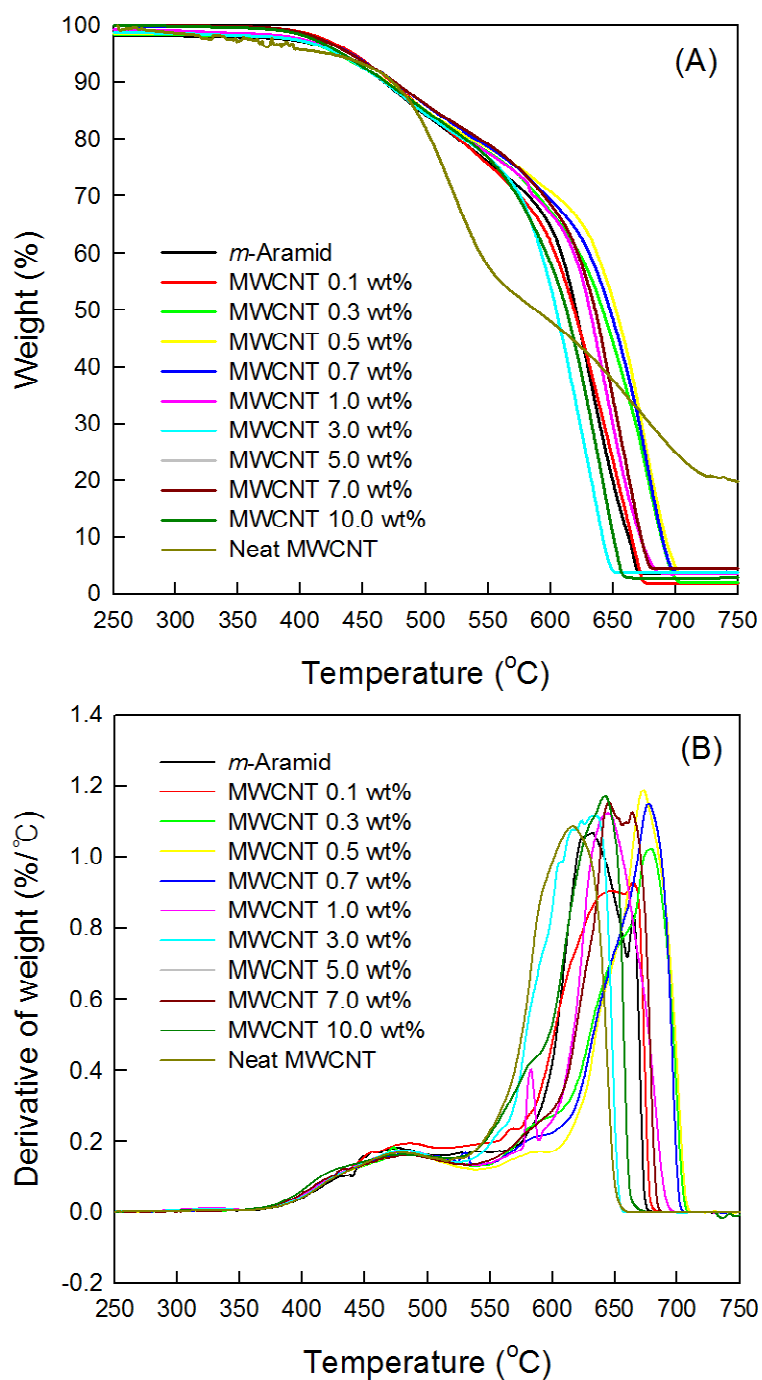

**Figure S1.** TGA thermograms of the neat *m*-aramid and its composite films with different MWCNT contents under the air condition at a heating rate of 10 °C/min.
